# Supplementary material for: Patient experience studies in the circumpolar region: a scoping review
Source: HighWire-hosted journal article supplement (doi:10.1136/bmjopen-2020-042973), 2020-10-01
Supplement: bmjopen-2020-042973supp001_data_supplement.pdf [file bmjopen-2020-042973supp001_data_supplement.pdf]

## Supplement 1 – Search strings

## Overview in table

| Patient experience terms                                                                                                                                                                                                                                                                                                                                                                              | Geographical/population block/terms                                                                                                                                                                                                                                                                                                                                                                                                                                                                                                                                                                                                                                                                                                                                                                                                                                                                                                                                                                                                                                                                                                                                                                                                                                                                                                                                                                                                                                                                                                                                                                                                                                                                                                                                                                                                                                                                                                                                                                                                                                                                                                                                                                                                                                                                                                                                                                |
|-------------------------------------------------------------------------------------------------------------------------------------------------------------------------------------------------------------------------------------------------------------------------------------------------------------------------------------------------------------------------------------------------------|----------------------------------------------------------------------------------------------------------------------------------------------------------------------------------------------------------------------------------------------------------------------------------------------------------------------------------------------------------------------------------------------------------------------------------------------------------------------------------------------------------------------------------------------------------------------------------------------------------------------------------------------------------------------------------------------------------------------------------------------------------------------------------------------------------------------------------------------------------------------------------------------------------------------------------------------------------------------------------------------------------------------------------------------------------------------------------------------------------------------------------------------------------------------------------------------------------------------------------------------------------------------------------------------------------------------------------------------------------------------------------------------------------------------------------------------------------------------------------------------------------------------------------------------------------------------------------------------------------------------------------------------------------------------------------------------------------------------------------------------------------------------------------------------------------------------------------------------------------------------------------------------------------------------------------------------------------------------------------------------------------------------------------------------------------------------------------------------------------------------------------------------------------------------------------------------------------------------------------------------------------------------------------------------------------------------------------------------------------------------------------------------------|
| "patient experience*" "patient satisfaction" "PREM#" (health and "user satisfaction") "patient input" (health and "user feedback") (health and "consumer satisfaction") (health and "consumer feedback") (health and "client satisfaction") (health and "client feedback") "care experience*" "patient dissatisfaction" "Perceived health care" "Perceived healthcare" (perception and "health care") | <p>Broad geographic regions (circumpolar or polar or arctic or greenland or Alaska or iceland or ((north* or rural or remote or polar or arctic or circumpolar) adj3 (norway or sweden or finland or Russia)) or "Barents region").ti,ab,kw.</p> <p>Indigenous group terms (inuit or sami or saami or "First Nation#" or metis or inuk or yup'ik or Inuviat* or Yupik* or Aleut* or Inupia* or "Alaska Native#" or dene or gwichin or gwich'in or Athabas* or).ti,ab,kw.</p> <p>Canada geographic terms (nunavut or nunavik or nunatsiavut or inuvialuit or yukon or northwest territories or nunavummiut or kitikmeot or qitirmiut or kivalliq or qikiqtani or baffin or kuujjuaq).ti,ab,kw.</p> <p>Sweden geographic terms (Jamtland or (Berg not "balance scale") or Bracke or Krokomb or Ragunda or Stromsund or (Are adj1 (Jamtland or Sweden or Sverige)) or Ostersund or Harjedalen or Vasternorrland or Sundsvallor Timra or Ange or Harnosand or "Kramfors Solleftea" or Ornskoldsvik or Vasterbotten or Dorotea or Lycksele or Mala or Sorsele or Storuman or Vilhelmina or Asele or Norsjo or Robertsfors or Skelleftea or Umea or Vindeln or Vannas or Bjurholm or Nordmaling or Norrbotten or Pajala or Overtornea or Overkalix or Boden or Kalix or Haparanda or Alysbyn or Lulea or Pitea or Kiruna or Gallivare or Jokkmokk or Arjeplog or Arvidsjaur).ti,ab,kw.</p> <p>Norway geographic terms (Nordland or Alstahaug or Andoy or Ballangen or Bejarn or Bindal or (Bo not ("breast oncoplasty" or "biological osteosynthesis" or "Barrett's oesophagus" or "buccalised occlusion")) or Bodo or Bronnoy or Donna or Evenes or Fauske or Flakstad or Gildeskal or Grane or Hadsel or Hamaroy or Hattfjelldal or Hemnes or Heroy or Leirfjord or Londingen or Luroy or Meloy or Moskenes or Narvik or Nesna or Oksnes or Rana or Rodoy or Rost or Saltdal or Somna or Sorfold or Sortland or Steigen or Tjeldsund or Traena or Tysfjord or Vaeroy or Vagan or Vefsn or Vega or Vestvagoy or Vevelstad or Troms or Balsfjord or Bardu or (Berg not "balance scale") or Dyroy or "Gaivuotna-Kafjord" or Gratangen or Harstad or Ibestad or Karlsoy or Kvaefjord or Kvaenangen or Lavangen or Lenvik or Lyngen or Malsely or Nordreisa or Salangen or Skanland or Skjervoy or Sorreisa or Storfjord or Torsken or Tranoy or Tromso or Finnmark or Alta or Berlevag or Batsfjord or</p> |

|                                                                                 |                                                                                                                                                                                                                                                                                                                                                                                                                                                                                                                                                                                                                                                                                                                                                                                                                                                                                                                                                                                                                                                                                                                                                                                                                                                                                                                                                                                                                                                                                                                                                                                                                                                                                                                                                                                                                                                                                                                                                                                                  |
|---------------------------------------------------------------------------------|--------------------------------------------------------------------------------------------------------------------------------------------------------------------------------------------------------------------------------------------------------------------------------------------------------------------------------------------------------------------------------------------------------------------------------------------------------------------------------------------------------------------------------------------------------------------------------------------------------------------------------------------------------------------------------------------------------------------------------------------------------------------------------------------------------------------------------------------------------------------------------------------------------------------------------------------------------------------------------------------------------------------------------------------------------------------------------------------------------------------------------------------------------------------------------------------------------------------------------------------------------------------------------------------------------------------------------------------------------------------------------------------------------------------------------------------------------------------------------------------------------------------------------------------------------------------------------------------------------------------------------------------------------------------------------------------------------------------------------------------------------------------------------------------------------------------------------------------------------------------------------------------------------------------------------------------------------------------------------------------------|
| <p>(perception and "healthcare") "Patient perspective" (quality experienc*)</p> | <p>Gamvik or Hammerfest or Hasvik or Karasjohka or Karasjok or Guovdageaidnu or Kautokeino or Kvalsund or Lebesby or Loppa or Masoy or Unjarga or Nesseby or Nordkapp or Porsanger or Porsangu or Porsanki or Sor-Varanger or Deatnu or Tana or Vadso or Vardo or Svalbard or Longyearbyen or Ny-Alesund or Barentsburg or Pyramiden or Sveagruva).ti,ab,kw.</p> <p>Finland geographic terms<br/>(Oulu or Kainuu or Hyrynsalmi or Kajaani or Kuhmo or Paltamo or Puolanka or Ristijarvi or Sotkama or Suomussalmi or Northern Ostrobothnia or Alavieska or Haapajarvi or Haapevesi or Hailuoto or Li or Kalajoki or Kempele or Kuusamo or Karsamaki or Liminka or Lumijoki or Merijarvi or Muhos or Nivala or Oulainen or Pudasjarvi or Pyhajoki or Pyhajarvi or Pyhanta or Raahe or Reisjarvi or Sievi or Siikajoki or Siikalatva or Taivalkoski or Tyrnava or Utajarvi or Vaala or Ylivieska or Lapland or Kemijarvi or Pelkosenniemi or Posio or Salla or Savukoski or Kemi or Keminmaa or Simo or Tervola or Tornio or Inari or Sodankyla or Utsjoki or Ranua or Rovaniemi or Pello or Ylitornio or Kolari or Muonio or Kittila or Enontekio).ti,ab,kw.</p> <p>Russia geographic terms<br/>("Kola Peninsula" or Kamchatka or Arkhangelsk or Sakha or Karelia or Komi or Franz Josef or "Kolguev Island" or "Novaya Zemlya" or "Bely Island" or "Shokalsky Island" or "Vilkitsky Island" or "Oleniy Island" or "Zapovednik Islands" or "Vize Island" or "Ushakov Island" or "Severnaya Island" or "Bolshoy Begichev Island" or "New Siberian Islands" or "Medvyezhi or Islands" or "Ayon Island" or "Wrangel Island" or "Big Diomedes").ti,ab,kw.</p> <p>Circumpolar cities<br/>((Anchorage not teeth) or Juneau or Whitehorse or Yellowknife or Iqaluit or Nuuk or Torshavn or Reykjavik or Murmansk or Petrozavodsk or "Naryan-Mar" or Syktyvkar or "Novy Urengoy" or Salekhard or Surgut or "Khanty-Mansiysk" or Dudinka or Tura or Yakutsk or Magadan or Palana or Anadyr).ti,ab,kw.]</p> |
|---------------------------------------------------------------------------------|--------------------------------------------------------------------------------------------------------------------------------------------------------------------------------------------------------------------------------------------------------------------------------------------------------------------------------------------------------------------------------------------------------------------------------------------------------------------------------------------------------------------------------------------------------------------------------------------------------------------------------------------------------------------------------------------------------------------------------------------------------------------------------------------------------------------------------------------------------------------------------------------------------------------------------------------------------------------------------------------------------------------------------------------------------------------------------------------------------------------------------------------------------------------------------------------------------------------------------------------------------------------------------------------------------------------------------------------------------------------------------------------------------------------------------------------------------------------------------------------------------------------------------------------------------------------------------------------------------------------------------------------------------------------------------------------------------------------------------------------------------------------------------------------------------------------------------------------------------------------------------------------------------------------------------------------------------------------------------------------------|

### Copy-pastable search string

((("patient experience\*" or "patient satisfaction" or "PREM#" or (health and "user satisfaction") or "patient input" or (health and "user feedback") or (health and "consumer satisfaction") or (health and "consumer feedback") or (health and "client satisfaction") or (health and "client feedback") or "care experience\*" or "patient dissatisfaction" or "Perceived health care" or "Perceived healthcare" or (perception and "health care") or (perception and "healthcare") or "Patient perspective" or (quality adj3 experienc\*)),af.]) AND (((circumpolar or polar or arctic or greenland or Alaska or iceland or ((north\* or rural or remote or polar or arctic or circumpolar) adj3 (norway or sweden or finland or Russia)) or "Barents region").ti,ab,kw.) OR ((inuit or sami or saami or "First Nation#" or metis or inuk or yup'ik or Inuviat\* or Yupik\* or Aleut\* or Inupia\* or "Alaska Native#" or dene or gwichin or gwich'in or Athabas\*).ti,ab,kw.) OR ((nunavut or nunavik or nunatsiavut or inuvialuit or yukon or

northwest territories or nunavummiut or kitikmeot or qitirmiut or kivalliq or qikiqtani or baffin or kuujuaq).ti,ab,kw.) OR ((Jamtland or (Berg not "balance scale") or Bracke or Krokrom or Ragunda or Stromsund or (Are adj1 (Jamtland or Sweden or Sverige)) or Ostersund or Harjedalen or Vasternorrland or Sundsvallor or Timra or Ange or Harnosand or "Kramfors Solleftea" or Ornskoldsvik or Vasterbotten or Dorotea or Lycksele or Mala or Sorsele or Storuman or Vilhelmina or Asele or Norsjo or Robertsfors or Skelleftea or Umea or Vindeln or Vannas or Bjurholm or Nordmaling or Norrbotten or Pajala or Overtornea or Overkalix or Boden or Kalix or Haparanda or Alysbyn or Lulea or Pitea or Kiruna or Gallivare or Jokkmokk or Arjeplog or Arvidsjaur).ti,ab,kw.) OR ((Nordland or Alstahaug or Andoy or Ballangen or Bejarn or Bindal or (Bo not ("breast oncoplasty" or "biological osteosynthesis" or "Barrett's oesophagus" or "buccalised occlusion")) or Bodo or Bronnoy or Donna or Evenes or Fauske or Flakstad or Gildeskal or Grane or Hadsel or Hamaroy or Hattfjelldal or Hemnes or Heroy or Leirfjord or Londingen or Luroy or Meloy or Moskenes or Narvik or Nesna or Oksnes or Rana or Rodoy or Rost or Saltdal or Somna or Sorfold or Sortland or Steigen or Tjeldsund or Traena or Tysfjord or Vaeroy or Vagan or Vefsn or Vega or Vestvagoy or Vevelstad or Troms or Balsfjord or Bardu or (Berg not "balance scale") or Dyroy or "Gaivuotna-Kafjord" or Gratangen or Harstad or Ibestad or Karlsoy or Kvaefjord or Kvaenangen or Lavangen or Lenvik or Lyngen or Malsely or Nordreisa or Salangen or Skanland or Skjervoy or Sorreisa or Storfjord or Torsken or Tranoy or Tromso or Finnmark or Alta or Berlevag or Batsfjord or Gamvik or Hammerfest or Hasvik or Karasjohka or Karasjok or Guovdageaidnu or Kautokeino or Kvalsund or Lebesby or Loppa or Masoy or Unjarga or Nesseby or Nordkapp or Porsanger or Porsangu or Porsanki or Sor-Varanger or Deatnu or Tana or Vadso or Vardo or Svalbard or Longyearbyen or Ny-Alesund or Barentsburg or Pyramiden or Sveagruva).ti,ab,kw.) OR ((Oulu or Kainuu or Hyrynsalmi or Kajaani or Kuhmo or Paltamo or Puolanka or Ristijarvi or Sotkama or Suomussalmi or Northern Ostrobothnia or Alavieska or Haapajarvi or Haapevesi or Hailuoto or Li or Kalajoki or Kempele or Kuusamo or Karsamaki or Liminka or Lumijoki or Merijarvi or Muhos or Nivala or Oulainen or Pudasjarvi or Pyhajoki or Pyhajarvi or Pyhanta or Raahe or Reisjarvi or Sievi or Siikajoki or Siikalatva or Taivalkoski or Tyrnava or Utajarvi or Vaala or Ylivieska or Lapland or Kemijarvi or Pelkosenniemi or Posio or Salla or Savukoski or Kemi or Keminmaa or Simo or Tervola or Tornio or Inari or Sodankyla or Utsjoki or Ranua or Rovaniemi or Pello or Ylitornio or Kolari or Muonio or Kittila or Enontekio).ti,ab,kw.) OR (("Kola Peninsula" or Kamchatka or Arkhangelsk or Sakha or Karelia or Komi or Franz Josef or "Kolguev Island" or "Novaya Zemlya" or "Bely Island" or "Shokalsky Island" or "Vilkitsky Island" or "Oleniy Island" or "Zapovednik Islands" or "Vize Island" or "Ushakov Island" or "Severnaya Island" or "Bolshoy Begichev Island" or "New Siberian Islands" or "Medvyezhi or Islands" or "Ayon Island" or "Wrangel Island" or "Big Diomedes").ti,ab,kw.) OR (((Anchorage not teeth) or Juneau or Whitehorse or Yellowknife or Iqaluit or Nuuk or Torshavn or Reykjavik or Murmansk or Petrozavodsk or "Naryan-Mar" or Syktyvkar or "Novy Urengoy" or Salekhard or Surgut or "Khanty-Mansiysk" or Dudinka or Tura or Yakutsk or Magadan or Palana or Anadyr).ti,ab,kw.)]
