# Supplementary material for: Patient experience studies in the circumpolar region: a scoping review
Source: HighWire-hosted journal article supplement (doi:10.1136/bmjopen-2020-042973), 2020-10-01
Supplement: bmjopen-2020-042973supp003_data_supplement.pdf [file bmjopen-2020-042973supp003_data_supplement.pdf]

| Ref list # | Author                           | Year | Title                                                                                                                                                                                                    | Language  | Study Design  | Method 1                | Method 2      | Method 3     | Method 4  | Country 1 | Country 2 | Country 3 | Reason for Seeking Treatment 1 | Telehealth | Indigenous values | Rural/remote | Climate Change |
|------------|----------------------------------|------|----------------------------------------------------------------------------------------------------------------------------------------------------------------------------------------------------------|-----------|---------------|-------------------------|---------------|--------------|-----------|-----------|-----------|-----------|--------------------------------|------------|-------------------|--------------|----------------|
| 15         | Hiratsuka, et al.                | 2013 | Patient and provider perspectives on using telemedicine for chronic disease management among Native Hawaiian and Alaska Native people.                                                                   | English   | Qualitative   | Focus groups            |               |              |           | USA       |           |           | PHC                            | TRUE       | TRUE              | TRUE         | FALSE          |
| 16         | Boman, et al.                    | 2014 | Robot-assisted remote echocardiographic examination and teleconsultation: A randomized comparison of time to diagnosis with standard of care referral approach                                           | English   | Quantitative  | Survey                  |               |              |           | Sweden    |           |           | PHC                            | TRUE       | FALSE             | TRUE         | FALSE          |
| 24         | O'Neil                           | 1989 | The Cultural and Political Context of Patient Dissatisfaction in Cross Cultural Clinical Encounters: A Canadian Inuit Study                                                                              | English   | Qualitative   | Participant observation | Text analysis | Focus groups | Interview | Canada    |           |           | General                        | FALSE      | TRUE              | TRUE         | FALSE          |
| 25         | Sigurhardottir                   | 1996 | Satisfaction among ambulatory surgery patients in two hospitals in Iceland.                                                                                                                              | English   | Quantitative  | Survey                  |               |              |           | Iceland   |           |           | Surgery                        | FALSE      | FALSE             | FALSE        | FALSE          |
| 26         | Bragadóttir                      | 1999 | A descriptive study of the extent to which self-perceived needs of parents are met in paediatric units in Iceland.                                                                                       | English   | Quantitative  | Survey                  |               |              |           | Iceland   |           |           | Pediatrics                     | FALSE      | FALSE             | FALSE        | FALSE          |
| 27         | Gottfredsdóttir, et al.          | 2016 | Content of antenatal care: Does it prepare women for birth?                                                                                                                                              | English   | Quantitative  | Survey                  |               |              |           | Iceland   |           |           | Maternal Health                | FALSE      | FALSE             | FALSE        | FALSE          |
| 28         | Jonsdóttir, et al.               | 2015 | Chronic pain-related patient-provider communication: The significance of health related quality of life and satisfaction                                                                                 | English   | Quantitative  | Survey                  |               |              |           | Iceland   |           |           | Pain                           | FALSE      | FALSE             | FALSE        | FALSE          |
| 29         | Snorraddóttir, et al.            | 2014 | [Patient satisfaction with care and interaction with staff in the Acute Cardiac Unit at Landsþítill - The National University Hospital of Iceland]                                                       | Icelandic | Quantitative  | Survey                  |               |              |           | Iceland   |           |           | Emergency                      | FALSE      | FALSE             | FALSE        | FALSE          |
| 30         | Jonsdóttir, et al.               | 2016 | Patients' Perception of Chronic-Pain-Related Patient-Provider Communication in Relation to Sociodemographic and Pain-Related Variables: A Cross-Sectional Nationwide Study.                              | English   | Quantitative  | Survey                  |               |              |           | Iceland   |           |           | Pain                           | FALSE      | FALSE             | FALSE        | FALSE          |
| 31         | Zoëga, et al.                    | 2015 | Quality Pain Management in the Hospital Setting from the Patient's Perspective                                                                                                                           | English   | Quantitative  | Survey                  |               |              |           | Iceland   |           |           | Pain                           | FALSE      | FALSE             | FALSE        | FALSE          |
| 32         | Sigurdardóttir, et al.           | 2017 | The predictive role of support in the birth experience: A longitudinal cohort study                                                                                                                      | English   | Quantitative  | Survey                  |               |              |           | Iceland   |           |           | Maternal Health                | FALSE      | FALSE             | FALSE        | FALSE          |
| 33         | Hjorleifsdóttir, et al.          | 2010 | Satisfaction with care in oncology outpatient clinics: Psychometric characteristics of the                                                                                                               | English   | Quantitative  | Survey                  |               |              |           | Iceland   |           |           | Cancer                         | FALSE      | FALSE             | FALSE        | FALSE          |
| 34         | Baldursdóttir & Jonsdóttir       | 2002 | The importance of nurse caring behaviors as perceived by patients receiving care at an emergency department.                                                                                             | English   | Quantitative  | Survey                  |               |              |           | Iceland   |           |           | Emergency                      | FALSE      | FALSE             | FALSE        | FALSE          |
| 35         | Sigurdardóttir, et al.           | 2017 | The importance of family support in pediatrics and its impact on healthcare satisfaction.                                                                                                                | English   | Quantitative  | Survey                  |               |              |           | Iceland   |           |           | PHC                            | FALSE      | FALSE             | FALSE        | FALSE          |
| 36         | Haldorsdóttir & Karlsdóttir      | 1996 | Empowerment or discouragement: women's experience of caring and uncaring encounters during childbirth                                                                                                    | English   | Qualitative   | Interview               |               |              |           | Iceland   |           |           | Maternal Health                | FALSE      | FALSE             | FALSE        | FALSE          |
| 37         | Hjorleifsdóttir, et al.          | 2008 | Living with cancer and perception of care: Icelandic oncology outpatients, a qualitative study.                                                                                                          | English   | Qualitative   | Interview               |               |              |           | Iceland   |           |           | Cancer                         | FALSE      | FALSE             | FALSE        | FALSE          |
| 38         | Hjorleifsdóttir                  | 1997 | Icelandic women's identifications of stressors and social support during the diagnostic phase of breast cancer                                                                                           | English   | Qualitative   | Interview               |               |              |           | Iceland   |           |           | Cancer                         | FALSE      | FALSE             | FALSE        | FALSE          |
| 39         | Thorsteinsson                    | 2002 | The quality of nursing care as perceived by individuals with chronic illnesses: The magical touch of nursing                                                                                             | English   | Qualitative   | Interview               |               |              |           | Iceland   |           |           | PHC                            | FALSE      | FALSE             | FALSE        | FALSE          |
| 40         | Biering & Jensen                 | 2011 | The concept of patient satisfaction in adolescent psychiatric care: A qualitative study                                                                                                                  | English   | Qualitative   | Interview               |               |              |           | Iceland   |           |           | Mental Health/Addiction        | FALSE      | FALSE             | FALSE        | FALSE          |
| 41         | Löve, et al.                     | 2018 | Trading autonomy for services: Perceptions of users and providers of services for disabled people in Iceland                                                                                             | English   | Qualitative   | Interview               |               |              |           | Iceland   |           |           | Disability                     | FALSE      | FALSE             | FALSE        | FALSE          |
| 42         | Jóhannesdóttir & Hjorleifsdóttir | 2018 | Communication is more than just a conversation: family members' satisfaction with end-of-life care                                                                                                       | English   | Qualitative   | Interview               |               |              |           | Iceland   |           |           | Geriatric Health               | FALSE      | FALSE             | FALSE        | FALSE          |
| 43         | Traulsen, et al.                 | 2002 | The lay user perspective on the quality of pharmaceuticals, drug therapy and pharmacy services—results of focus group discussions.                                                                       | English   | Qualitative   | Focus groups            |               |              |           | Iceland   |           |           | Pharmacy                       | FALSE      | FALSE             | TRUE         | FALSE          |
| 44         | Arnadóttir, et al.               | 2012 | Evaluation of therapy services with the Measure of Processes of Care (MPOC-20): The perspectives of Icelandic parents of children with physical disability                                               | English   | Mixed-Methods | Focus groups            | Survey        |              |           | Iceland   |           |           | Disability                     | FALSE      | FALSE             | TRUE         | FALSE          |
| 45         | Svavarsdóttir, et al.            | 2013 | A Holistic View in Psychiatric Rehabilitation: The Effects of Structure in Psychiatric Institutions                                                                                                      | English   | Mixed-Methods | Survey                  | Interview     |              |           | Iceland   |           |           | Mental Health/Addiction        | FALSE      | FALSE             | FALSE        | FALSE          |
| 46         | Ingadóttir, et al.               | 2014 | The fulfillment of knowledge expectations during the perioperative period of patients undergoing knee arthroplasty – a Nordic perspective.                                                               | English   | Quantitative  | Survey                  |               |              |           | Finland   | Iceland   | Sweden    | Surgery                        | FALSE      | FALSE             | FALSE        | FALSE          |
| 47         | Lundgren, et al.                 | 2009 | Long-term memories and experiences of childbirth in a Nordic context-A secondary analysis.                                                                                                               | English   | Qualitative   | Interview               |               |              |           | Finland   | Iceland   | Sweden    | Maternal Health                | FALSE      | FALSE             | FALSE        | FALSE          |
| 48         | Sjöblom, et al.                  | 2014 | Creating a safe haven-women's experiences of the midwife's professional skills during planned home birth in four Nordic countries.                                                                       | English   | Mixed-Methods | Survey                  | Text analysis |              |           | Norway    | Iceland   | Sweden    | Maternal Health                | FALSE      | FALSE             | FALSE        | FALSE          |
| 49         | Risberg, et al.                  | 1997 | Communicating with and treating cancer patients: how does the use of non-proven therapies and patients' feeling of mental distress influence the interaction between the patient and the hospital staff? | English   | Quantitative  | Survey                  |               |              |           | Norway    |           |           | Cancer                         | FALSE      | FALSE             | FALSE        | FALSE          |
| 50         | Bekkelund, et al.                | 2014 | Patient satisfaction with conventional, complementary, and alternative treatment for cluster headache in a Norwegian cohort.                                                                             | English   | Quantitative  | Survey                  |               |              |           | Norway    |           |           | Headache                       | FALSE      | FALSE             | FALSE        | FALSE          |
| 51         | Wahlberg, et al.                 | 2016 | Impact of referral templates on patient experience of the referral and care process: a cluster randomised trial.                                                                                         | English   | Quantitative  | Survey                  |               |              |           | Norway    |           |           | Surgery                        | FALSE      | FALSE             | FALSE        | FALSE          |
| 52         | Bekkelund & Salvesen             | 2006 | Patient satisfaction with assessment of headache in specialist centres                                                                                                                                   | Norwegian | Quantitative  | Survey                  |               |              |           | Norway    |           |           | Headache                       | FALSE      | FALSE             | FALSE        | FALSE          |
| 53         | Garratt, et al.                  | 2010 | The Patient Experiences Questionnaire for Out-of-Hours Care (PEQ-OHC): data quality, reliability, and validity.                                                                                          | English   | Quantitative  | Survey                  |               |              |           | Norway    |           |           | PHC                            | FALSE      | FALSE             | FALSE        | FALSE          |
| 54         | Olsen & Fykesnes                 | 1993 | The health survey in Finnmark—satisfaction with hospital services                                                                                                                                        | Norwegian | Quantitative  | Survey                  |               |              |           | Norway    |           |           | General                        | FALSE      | FALSE             | TRUE         | FALSE          |
| 55         | Lian & Wilsaard                  | 2004 | Patient satisfaction in general practice before and after the introduction of a list patient                                                                                                             | Norwegian | Quantitative  | Survey                  |               |              |           | Norway    |           |           | PHC                            | FALSE      | FALSE             | TRUE         | FALSE          |
| 56         | Olsen & Fykesnes                 | 1991 | The health survey in Finnmark—how is the population satisfied with community health services?                                                                                                            | Norwegian | Quantitative  | Survey                  |               |              |           | Norway    |           |           | General                        | FALSE      | FALSE             | TRUE         | FALSE          |
| 57         | Sorlie & Nergard                 | 2005 | Treatment satisfaction and recovery in Saami and Norwegian patients following psychiatric hospital treatment: a comparative study.                                                                       | English   | Quantitative  | Survey                  |               |              |           | Norway    |           |           | Mental Health/Addiction        | FALSE      | TRUE              | FALSE        | FALSE          |
| 58         | Nystad, et al.                   | 2008 | Sami speakers are less satisfied with general practitioners' services.                                                                                                                                   | English   | Quantitative  | Survey                  |               |              |           | Norway    |           |           | PHC                            | FALSE      | TRUE              | TRUE         | FALSE          |
| 59         | Pedersen & Holand                | 1995 | Tele-endoscopic otorhinolaryngological examination: preliminary study of patient satisfaction.                                                                                                           | English   | Quantitative  | Survey                  |               |              |           | Norway    |           |           | Surgery                        | TRUE       | FALSE             | TRUE         | FALSE          |
| 60         | Muller, et al.                   | 2017 | Headache patients' satisfaction with telemedicine: a 12-month follow-up randomized non-inferiority trial.                                                                                                | English   | Quantitative  | Survey                  |               |              |           | Norway    |           |           | Headache                       | TRUE       | FALSE             | TRUE         | FALSE          |
| 61         | Moseng                           | 2000 | Teledermatology - The north Norwegian experience                                                                                                                                                         | Norwegian | Quantitative  | Survey                  |               |              |           | Norway    |           |           | Dermatology                    | TRUE       | FALSE             | TRUE         | FALSE          |
| 62         | Garcia, et al.                   | 2014 | A pharmacist-led follow-up program for patients with coronary heart disease in North Norway—a qualitative study exploring patient experiences.                                                           | English   | Qualitative   | Interview               |               |              |           | Norway    |           |           | Pharmacy                       | FALSE      | FALSE             | FALSE        | FALSE          |
| 63         | Hagensen, et al.                 | 2018 | The struggle against perceived negligence. A qualitative study of patients' experiences of adverse events in Norwegian hospitals.                                                                        | English   | Qualitative   | Interview               |               |              |           | Norway    |           |           | General                        | FALSE      | FALSE             | FALSE        | FALSE          |
| 64         | Trumpy                           | 2002 | Should hospital patients get copies of their medical reports?                                                                                                                                            | Norwegian | Qualitative   | Interview               |               |              |           | Norway    |           |           | Surgery                        | FALSE      | FALSE             | FALSE        | FALSE          |
| 65         | Klausen, et al.                  | 2017 | Shared decision making from the service users' perspective: A narrative study from community mental health centers in northern Norway.                                                                   | English   | Qualitative   | Interview               |               |              |           | Norway    |           |           | Mental Health/Addiction        | FALSE      | FALSE             | TRUE         | FALSE          |
| 66         | Dagsvold, et al.                 | 2015 | What can we talk about, in which language, in what way and with whom? Sami patients' experiences of language choice and cultural norms in mental health treatment                                        | English   | Qualitative   | Interview               |               |              |           | Norway    |           |           | Mental Health/Addiction        | FALSE      | TRUE              | FALSE        | FALSE          |
| 67         | Hanssen & Kuven                  | 2016 | Moments of joy and delight: the meaning of traditional food in dementia care.                                                                                                                            | English   | Qualitative   | Interview               |               |              |           | Norway    |           |           | Geriatric Health               | FALSE      | TRUE              | FALSE        | FALSE          |
| 68         | Hanssen                          | 2013 | The influence of cultural background in intercultural dementia care: Exemplified by Sami                                                                                                                 | English   | Qualitative   | Interview               |               |              |           | Norway    |           |           | Geriatric Health               | FALSE      | TRUE              | FALSE        | FALSE          |
| 69         | Holtan                           | 1998 | Patient reactions to specialist telemedicine consultations—a sociological approach.                                                                                                                      | English   | Qualitative   | Interview               |               |              |           | Norway    |           |           | Surgery                        | TRUE       | FALSE             | FALSE        | FALSE          |

|     |                             |      |                                                                                                                                                                                                       |           |               |                         |               |                         |       |       |       |       |
|-----|-----------------------------|------|-------------------------------------------------------------------------------------------------------------------------------------------------------------------------------------------------------|-----------|---------------|-------------------------|---------------|-------------------------|-------|-------|-------|-------|
| 70  | Blx & Hamran                | 2017 | "They take care of their own": healthcare professionals' constructions of Sami persons with dementia and their families' reluctance to seek and accept help through attributions to multiple contexts | English   | Qualitative   | Focus groups            | Norway        | Geriatric Health        | FALSE | TRUE  | TRUE  | FALSE |
| 71  | Rotvold, et al.             | 2003 | Telemedicine screening for diabetic retinopathy: staff and patient satisfaction.                                                                                                                      | English   | Mixed-Methods | Interview               | Norway        | Diabetes                | TRUE  | FALSE | TRUE  | FALSE |
| 72  | Lovren, et al.              | 1998 | The view of caring among patients and personnel.                                                                                                                                                      | English   | Quantitative  | Survey                  | Sweden        | General                 | FALSE | FALSE | FALSE | FALSE |
| 73  | Lovren, et al.              | 2002 | Effects of an implemented care policy on patient and personnel experiences of care.                                                                                                                   | English   | Quantitative  | Survey                  | Sweden        | PHC                     | FALSE | FALSE | FALSE | FALSE |
| 74  | Franzen, et al.             | 2008 | Injured road users' experience of care in the emergency department.                                                                                                                                   | English   | Quantitative  | Survey                  | Sweden        | Emergency               | FALSE | FALSE | FALSE | FALSE |
| 75  | Hodberg, et al.             | 2008 | Cesarean by choice? Empirical study of public attitudes.                                                                                                                                              | English   | Quantitative  | Survey                  | Sweden        | Maternal Health         | FALSE | FALSE | FALSE | FALSE |
| 76  | Anden, et al.               | 2010 | What happened? GPs' perceptions of consultation outcomes and a comparison with the experiences of their patients.                                                                                     | English   | Quantitative  | Survey                  | Sweden        | PHC                     | FALSE | FALSE | FALSE | FALSE |
| 77  | Hildingsson, et al.         | 2011 | Fathers' birth experience in relation to midwifery care.                                                                                                                                              | English   | Quantitative  | Survey                  | Sweden        | Maternal Health         | FALSE | FALSE | FALSE | FALSE |
| 78  | Haines, et al.              | 2013 | The role of women's attitudinal profiles in satisfaction with the quality of their antenatal and intrapartum care.                                                                                    | English   | Quantitative  | Survey                  | Sweden        | Maternal Health         | FALSE | FALSE | FALSE | FALSE |
| 79  | Sandlund & Hansson          | 1999 | Patient satisfaction in a comprehensive sectorized psychiatric service: Study of a 1-year-treated incidence cohort                                                                                    | English   | Quantitative  | Survey                  | Sweden        | Mental Health/Addiction | FALSE | FALSE | FALSE | FALSE |
| 80  | Gáfvels & Lithner           | 1996 | Insulin-treated diabetic patients: Use of, experience of and attitudes to diabetes care                                                                                                               | English   | Quantitative  | Survey                  | Sweden        | Diabetes                | FALSE | FALSE | TRUE  | FALSE |
| 81  | Daerga, et al.              | 2012 | The confidence in health care and social services in northern Sweden-A comparison between reindeer-herding Sami and the non-Sami majority population.                                                 | English   | Quantitative  | Survey                  | Sweden        | PHC                     | FALSE | TRUE  | TRUE  | FALSE |
| 82  | Gustafsson, et al.          | 2016 | Influence of self-care advice on patient satisfaction and healthcare utilization.                                                                                                                     | English   | Quantitative  | Survey                  | Sweden        | PHC                     | TRUE  | FALSE | FALSE | FALSE |
| 83  | Ljung, et al.               | 2013 | Patient experiences of a theory-based lifestyle-focused group treatment in the prevention of cardiovascular diseases and type 2 diabetes.                                                             | English   | Qualitative   | Interview               | Sweden        | Diabetes                | FALSE | FALSE | FALSE | FALSE |
| 84  | Aléx, et al.                | 2013 | Being cold when injured in a cold environment - Patients' experiences                                                                                                                                 | English   | Qualitative   | Interview               | Sweden        | Emergency               | FALSE | FALSE | FALSE | FALSE |
| 85  | Wiklund, et al.             | 2016 | Access to rehabilitation: patient perceptions of inequalities in access to specialty pain rehabilitation from a gender and intersectional perspective.                                                | English   | Qualitative   | Interview               | Sweden        | Pain                    | FALSE | FALSE | FALSE | FALSE |
| 86  | Gustafsson, et al.          | 2019 | Patient Satisfaction With Telephone Nursing: A Call for Calm, Clarity, and Competence.                                                                                                                | English   | Qualitative   | Text analysis           | Sweden        | General                 | TRUE  | FALSE | FALSE | FALSE |
| 87  | Alex, et al.                | 2013 | Patients' experiences of cold exposure during ambulance care.                                                                                                                                         | English   | Qualitative   | Participant observation | Sweden        | Emergency               | FALSE | FALSE | FALSE | FALSE |
| 88  | Skår & Söderberg            | 2018 | Patients' complaints regarding healthcare encounters and communication                                                                                                                                | English   | Mixed-Methods | Survey                  | Sweden        | General                 | FALSE | FALSE | FALSE | FALSE |
| 89  | Lindberg, et al.            | 2009 | Parents' experiences of using videoconferencing as a support in early discharge after childbirth.                                                                                                     | English   | Mixed-Methods | Interview               | Sweden        | Maternal Health         | TRUE  | FALSE | TRUE  | FALSE |
| 90  | Afifi, et al.               | 2005 | Perceived need and help-seeking for mental health problems among Canadian provinces                                                                                                                   | English   | Quantitative  | Survey                  | Canada        | Mental Health/Addiction | FALSE | FALSE | TRUE  | FALSE |
| 91  | Worthington, et al.         | 2010 | HIV testing experiences of Aboriginal youth in Canada: service implications.                                                                                                                          | English   | Quantitative  | Survey                  | Canada        | Communicable Disease    | FALSE | TRUE  | FALSE | FALSE |
| 92  | Cano & Foster               | 2016 | "They made me go through like weeks of appointments and everything": Documenting women's experiences seeking abortion care in Yukon territory, Canada.                                                | English   | Qualitative   | Interview               | Canada        | Maternal Health         | FALSE | FALSE | TRUE  | FALSE |
| 93  | Arnaert & Schaack           | 2006 | Cultural awareness of Inuit patients' experiences with emergency nursing care.                                                                                                                        | English   | Qualitative   | Interview               | Canada        | Emergency               | FALSE | TRUE  | TRUE  | FALSE |
| 94  | Oosterveer & Young          | 2015 | Primary health care accessibility challenges in remote indigenous communities in Canada's North.                                                                                                      | English   | Qualitative   | Interview               | Canada        | PHC                     | FALSE | TRUE  | TRUE  | TRUE  |
| 95  | Bird, et al.                | 2008 | Living with diabetes on Baffin Island: Inuit storytellers share their experiences                                                                                                                     | English   | Qualitative   | Interview               | Canada        | Diabetes                | FALSE | TRUE  | TRUE  | TRUE  |
| 96  | Fraser & Nadeau             | 2015 | Experience and representations of health and social services in a community of Nunavik                                                                                                                | English   | Qualitative   | Interview               | Canada        | General                 | FALSE | TRUE  | TRUE  | FALSE |
| 97  | Hanrahan                    | 2002 | Identifying the needs of Innu and Inuit patients in urban health settings in Newfoundland and Labrador.                                                                                               | English   | Qualitative   | Focus groups            | Canada        | General                 | FALSE | TRUE  | TRUE  | FALSE |
| 98  | Mendez, et al.              | 2013 | The use of remote presence for health care delivery in a northern Inuit community: a feasibility study.                                                                                               | English   | Mixed-Methods | Interview               | Canada        | General                 | TRUE  | TRUE  | TRUE  | FALSE |
| 99  | Quick & Bashshur            | 1991 | Three perspectives on community health aides: surveys of health aides, consumers and providers in western Alaska.                                                                                     | English   | Quantitative  | Survey                  | USA           | General                 | FALSE | FALSE | TRUE  | FALSE |
| 100 | Hagopian, et al.            | 2000 | The use of community surveys for health planning: the experience of 56 northwest rural communities.                                                                                                   | English   | Quantitative  | Survey                  | USA           | General                 | FALSE | FALSE | TRUE  | FALSE |
| 101 | DeCourtney                  | 1998 | Alaska Native community assessment: health care services, knowledge of health issues, and health education.                                                                                           | English   | Quantitative  | Survey                  | USA           | General                 | FALSE | FALSE | TRUE  | FALSE |
| 102 | Lanier, et al.              | 1999 | Pap prevalence and cervical cancer prevention among Alaska Native women.                                                                                                                              | English   | Qualitative   | Interview               | USA           | Cancer                  | FALSE | FALSE | FALSE | FALSE |
| 103 | Discoil, et al.             | 2010 | Assessing the influence of health on rural outmigration in Alaska                                                                                                                                     | English   | Qualitative   | Interview               | USA           | General                 | FALSE | FALSE | TRUE  | FALSE |
| 104 | DeMay                       | 2003 | The experience of being a client in an Alaska public health nursing home visitation program.                                                                                                          | English   | Qualitative   | Text analysis           | USA           | Maternal Health         | FALSE | FALSE | FALSE | FALSE |
| 105 | Panet                       | 2012 | Meeting the needs of breast cancer survivors in Alaska: Survivors' and healthcare providers' perspectives.                                                                                            | English   | Mixed-Methods | Interview               | USA           | Cancer                  | FALSE | FALSE | TRUE  | FALSE |
| 106 | Wetherhall, et al.          | 2011 | Cultural context in the effort to improve oral health among Alaska Native people: the dental health aide therapist model.                                                                             | English   | Mixed-Methods | Interview               | USA           | Dental                  | FALSE | TRUE  | TRUE  | TRUE  |
| 107 | Pelikka, et al.             | 2003 | Patients' views of good nursing care in an emergency unit                                                                                                                                             | Finnish   | Quantitative  | Survey                  | Finland       | Emergency               | FALSE | FALSE | FALSE | FALSE |
| 108 | Olkarinen, et al.           | 2000 | Patient satisfaction with health care services via videoconferencing                                                                                                                                  | English   | Quantitative  | Survey                  | Finland       | General                 | TRUE  | FALSE | FALSE | FALSE |
| 109 | Mielonen, et al.            | 2000 | Psychiatric inpatient care planning via telemedicine                                                                                                                                                  | English   | Quantitative  | Survey                  | Finland       | Mental Health/Addiction | TRUE  | FALSE | TRUE  | FALSE |
| 110 | Elsass, et al.              | 1994 | Greenlanders in hospital. An interview study of communication between patients and therapists, satisfaction and therapeutic preferences.                                                              | Danish    | Qualitative   | Interview               | Greenland     | General                 | FALSE | TRUE  | TRUE  | FALSE |
| 111 | Montgomery-Andersen, et al. | 2010 | There was no other way things could have been.' Greenlandic women's experiences of referral and transfer during pregnancy.                                                                            | English   | Qualitative   | Interview               | Greenland     | Maternal Health         | FALSE | TRUE  | TRUE  | FALSE |
| 112 | Hounsgaard, et al.          | 2013 | Women's perspectives on illness when being screened for cervical cancer.                                                                                                                              | English   | Qualitative   | Focus groups            | Greenland     | Cancer                  | FALSE | TRUE  | FALSE | FALSE |
| 113 | Aagaard                     | 2017 | Patient involvement in healthcare professional practice - a question about knowledge.                                                                                                                 | English   | Qualitative   | Participant observation | Greenland     | Cancer                  | FALSE | TRUE  | TRUE  | FALSE |
| 114 | Fotaki                      | 2006 | Users' perceptions of health care reforms: Quality of care and patient rights in four regions in the Russian Federation                                                                               | English   | Quantitative  | Survey                  | Russia        | General                 | FALSE | FALSE | FALSE | FALSE |
| 115 | Heiberg & Skurtveit         | 2005 | Voices of women in North-West Russia - About maternity care                                                                                                                                           | Norwegian | Quantitative  | Survey                  | Russia        | Maternal Health         | FALSE | FALSE | FALSE | FALSE |
| 116 | Kuznetsov, et al.           | 2013 | Hopelessness as a basis for tuberculosis diagnostic delay in the Arkhangelsk region: A grounded theory study                                                                                          | English   | Qualitative   | Focus groups            | Russia        | Communicable Disease    | FALSE | FALSE | TRUE  | FALSE |
| 117 | Askham, et al.              | 2010 | The information and support needs of Faroese women hospitalised with an acute coronary syndrome                                                                                                       | English   | Qualitative   | Interview               | Faroe Islands | Emergency               | FALSE | FALSE | FALSE | FALSE |
